# Supplementary material for: Metabolomic analysis to discriminate drug-induced liver injury (DILI) phenotypes
Source: PubMed Central journal article supplement (PMC8380240; doi:10.1007/s00204-021-03114-z), 2021-07-17

Figure S12

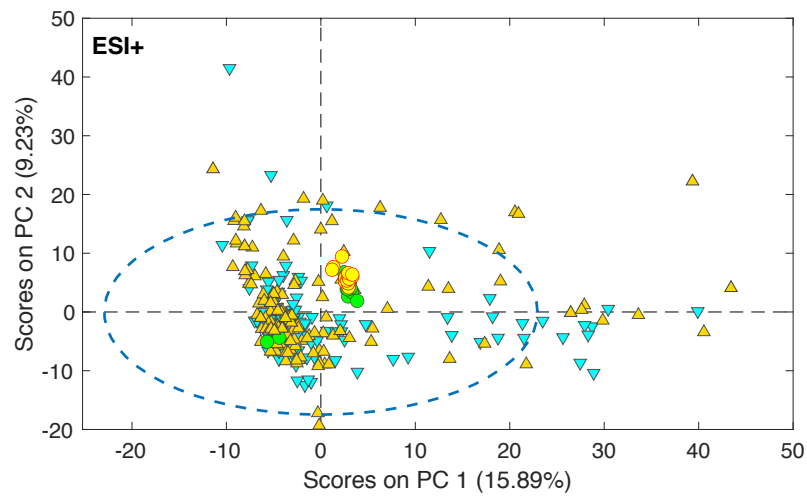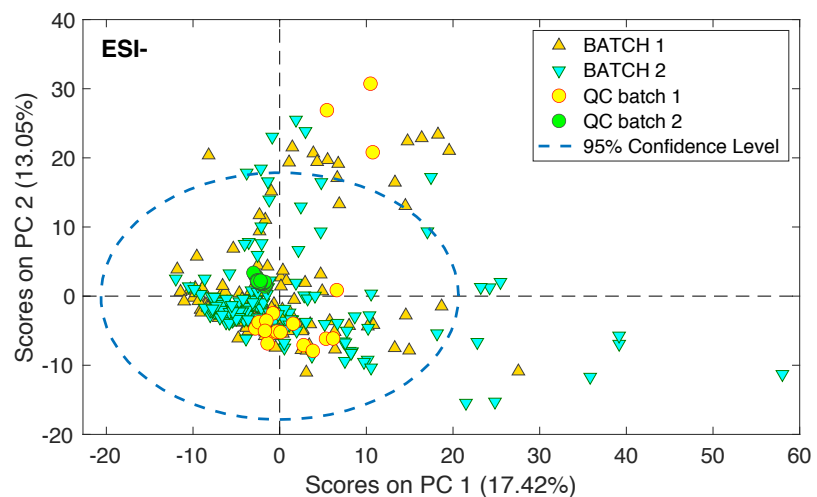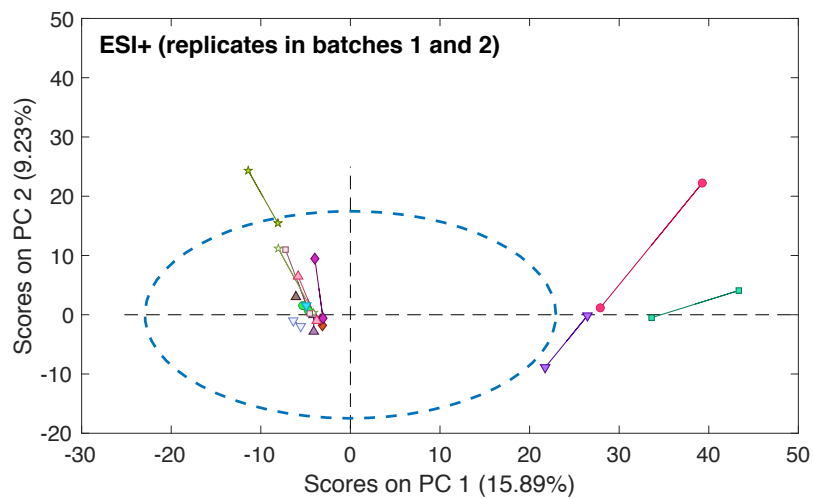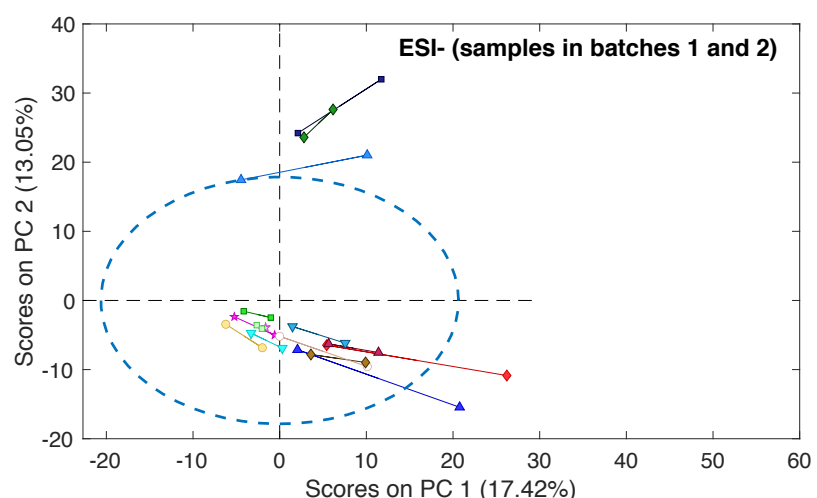

Supplement: 204_2021_3114_MOESM2_ESM.pdf [file 204_2021_3114_MOESM2_ESM.pdf]
